# Supplementary material for: A tumor-targeting and ROS-responsive iron-based T1magnetic resonance imaging contrast agent for highly specific tumor imaging
Source: Royal Society of Chemistry journal article supplement (doi:10.1039/d3tb00217a), 2023-01-01
Supplement: d3tb00217a1.pdf [file d3tb00217a1.pdf]

## Supplementary material

### **A Tumor-Targeting and ROS-Responsive Iron-Based T<sub>1</sub> Magnetic Resonance**

#### **Imaging Contrast Agent for Highly Specific Tumor Imaging**

*Jincong Yan<sup>1,2,3</sup>, Zhongzhong Lu<sup>1,2</sup>, Mingsheng Xu<sup>1,2</sup>, Jihuan Liu<sup>1,2</sup>, Ye Zhang<sup>2</sup>, Jingbo Yin<sup>3</sup>, Yi Cao<sup>\*,2</sup>, and Renjun Pei<sup>\*,1,2</sup>*

<sup>1</sup>School of Nano-Tech and Nano-Bionics, University of Science and Technology of China, Hefei 230026, China

<sup>2</sup>CAS Key Laboratory of Nano-Bio Interface, Division of Nanobiomedicine, Suzhou Institute of Nano-Tech and Nano-Bionics, Chinese Academy of Sciences, Suzhou 215123, China

<sup>3</sup>Department of Polymer Materials, School of Materials Science and Engineering, Shanghai University, Shanghai 200444, China

\*Corresponding Authors:

Renjun Pei, E-mail: [rjpei2011@sinano.ac.cn](mailto:rjpei2011@sinano.ac.cn); Tel.: +86 0512 628722776

Yi Cao, E-mail: [ycao2014@sinano.ac.cn](mailto:ycao2014@sinano.ac.cn); Tel.: +86 0512 62872587

## CONTENTS

Figure S1. TEM image of GA-Fe(II)-PEG and corresponding particle size distribution histogram.

Figure S2. Zeta potentials of GA-Fe(II)-PEG and GA-Fe(II)-PEG-FA in DI water.

Figure S3. XPS spectrum of GA-Fe(II)-PEG.

Figure S4. (a)  $T_1$  of GA-Fe(II)-PEG at different time points during the incubation with a series of  $H_2O_2$  solution. (b)  $r_1$  of GA-Fe(II)-PEG as a function of the molar concentration of Fe(II) in the solution before and after oxidation. (c) The  $T_1$ -weighted phantom images of GA-Fe(II)-PEG solution in a series of concentrations with or without  $H_2O_2$ .

Figure S5.  $T_1$  value of GA-Fe(II)-PEG-FA at an iron concentration of 1 mM in DI water, PBS and cell culture medium (DMEM) with 10% fetal bovine serum (v/v) at different time points, respectively.

Figure S6.  $T_1$  value of GA-Fe(II)-PEG-FA at a concentration of 1 mM after incubated with PBS solution at pH = 6.5 and 7.4 at different times, respectively.

Figure S7. Hemolysis of RBCs incubated with various concentrations of GA-Fe(II)-PEG-FA. The physiological saline and deionized water were served as negative and positive control, respectively.

Figure S8.  $T_1$ -weighted imaging of 4T1 cell and HUVEC cell incubated without any contrast agent, with GA-Fe(II)-PEG or GA-Fe(II)-PEG-FA.

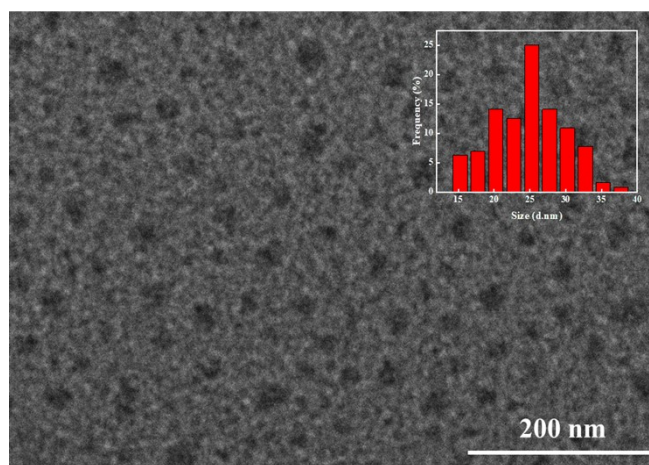

**Figure S1.** TEM image of GA-Fe(II)-PEG and corresponding particle size distribution histogram.

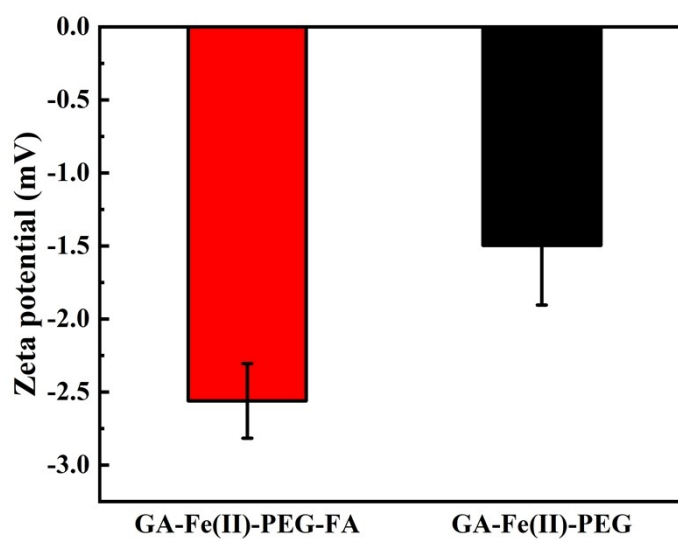

**Figure S2.** Zeta potentials of GA-Fe(II)-PEG and GA-Fe(II)-PEG-FA in DI water.

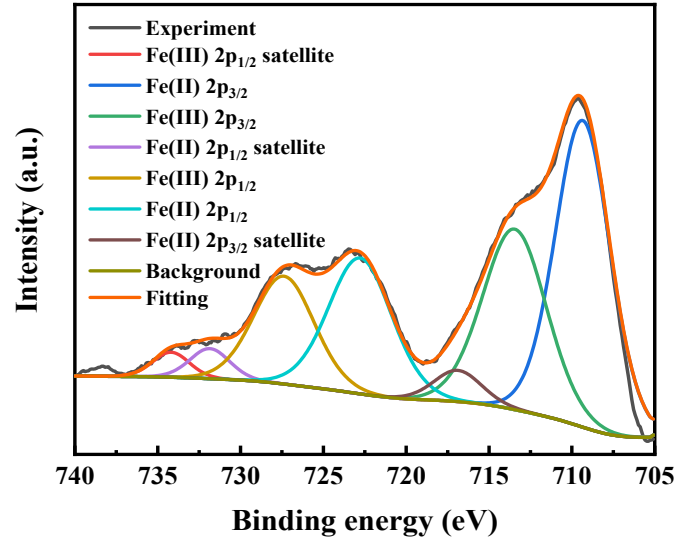

**Figure S3.** XPS spectrum of GA-Fe(II)-PEG.

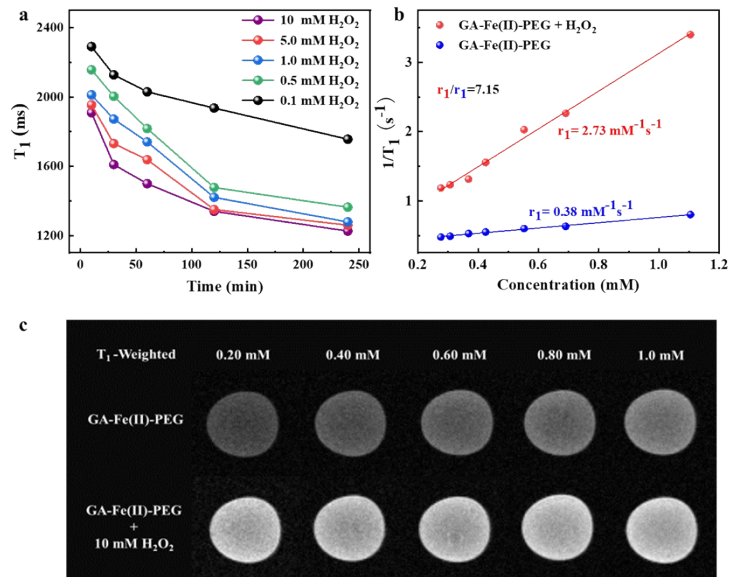

**Figure S4.** (a)  $T_1$  of GA-Fe(II)-PEG at different time points during the incubation with a series of  $H_2O_2$  solution. (b)  $r_1$  of GA-Fe(II)-PEG as a function of the molar concentration of Fe(II) in the solution before and after oxidation. (c) The  $T_1$ -weighted phantom images of GA-Fe(II)-PEG solution in a series of concentrations before and after oxidation.

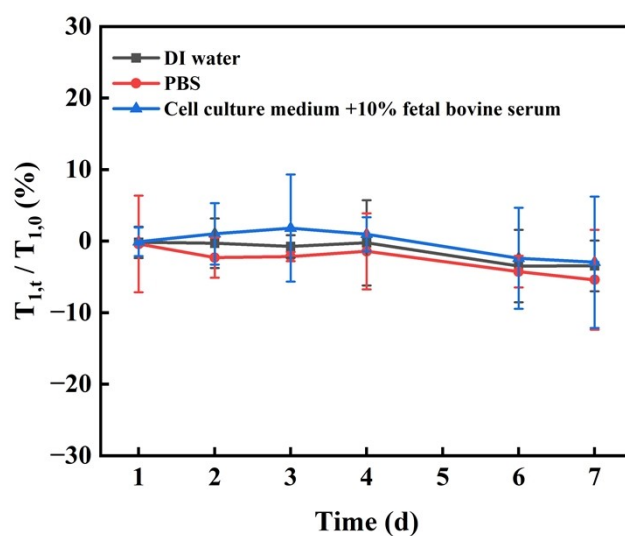

**Figure S5.**  $T_1$  value of GA-Fe(II)-PEG-FA at an iron concentration of 1 mM in DI water, PBS and cell culture medium (DMEM) with 10% fetal bovine serum (v/v) at different time points, respectively.

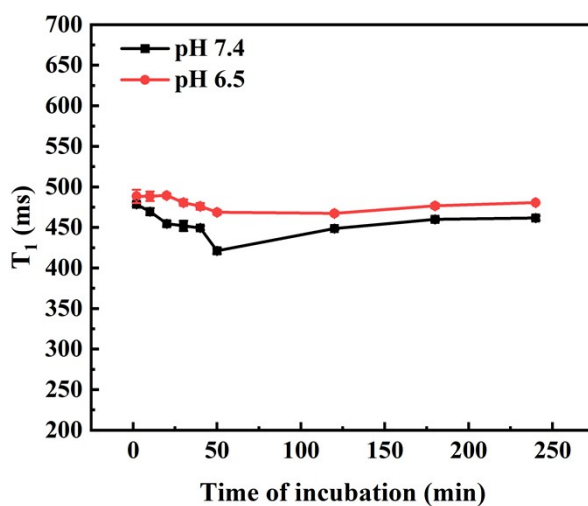

**Figure S6.**  $T_1$  value of GA-Fe(II)-PEG-FA at a concentration of 1 mM after incubated with PBS solution at pH = 6.5 and 7.4 at different times, respectively.

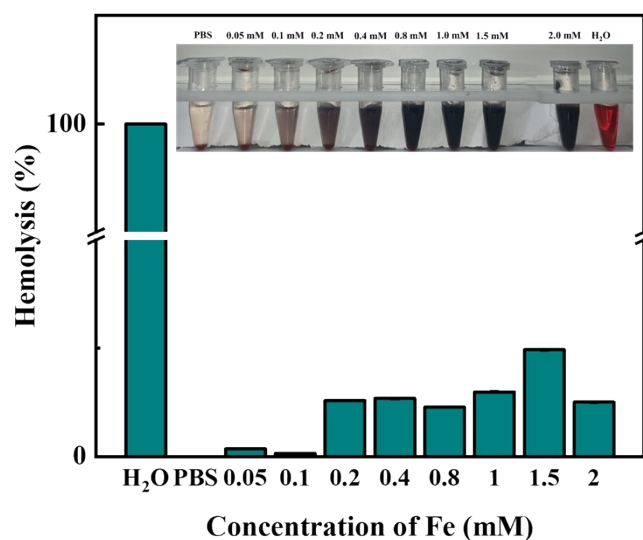

**Figure S7.** Hemolysis of RBCs incubated with various concentrations of GA-Fe(II)-PEG-FA. The physiological saline and deionized water were served as negative and positive control, respectively.

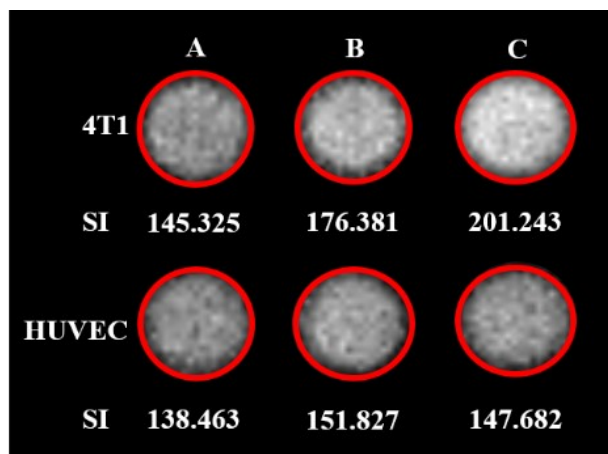

**Figure S8.** T<sub>1</sub>-weighted imaging of 4T1 cell and HUVEC cell incubated without any contrast agent (column A), with GA-Fe(II)-PEG (column B) or GA-Fe(II)-PEG-FA (column C). SI means signal intensity in terms of gray value.
